# Supplementary material for: Enhancing the internal electric field via twinning for boosting photocatalytic plastic reformation and H2 production
Source: Royal Society of Chemistry journal article supplement (doi:10.1039/d4gc01067a), 2024-01-01
Supplement: d4gc01067a1.pdf [file d4gc01067a1.pdf]

## **Enhancing the internal electric field *via* twinning for boosting photocatalytic plastic reformation and H<sub>2</sub> production**

Erling Zhao<sup>1</sup>, Pengfei Yin<sup>1</sup>, Kun Du<sup>2</sup>, Ning Lan<sup>1</sup>, Quanlu Wang<sup>1</sup>, Jiabin Guo<sup>1</sup>, Min Wang<sup>3</sup>, Tao Ling<sup>1,\*</sup>

<sup>1</sup> Key Laboratory for Advanced Ceramics and Machining Technology of Ministry of Education, Institute of New-Energy, School of Materials Science and Engineering, Tianjin University, Tianjin 300072, China.

<sup>2</sup> School of Materials Science and Engineering, Tianjin Chengjian University, China.

<sup>3</sup> School of Materials Science and Engineering, Hainan University, Haikou 570228, China.

\*Corresponding author \*Email: [lingt04@tju.edu.cn](mailto:lingt04@tju.edu.cn)

**Supporting Figures**

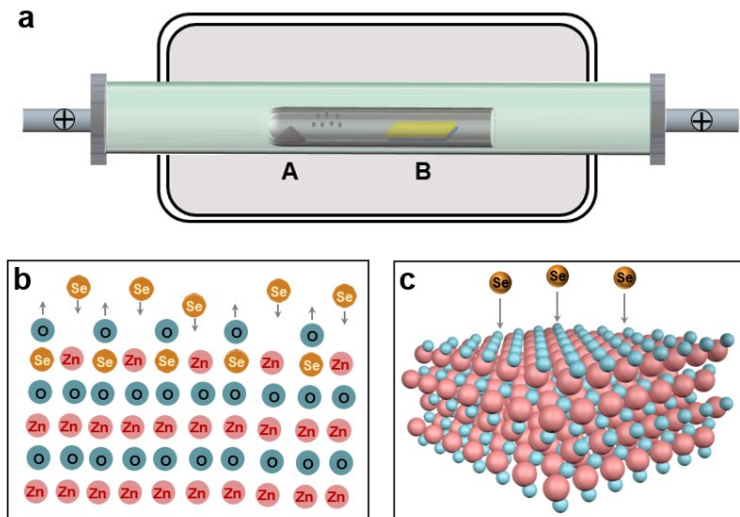

**Fig. S1** Schematic diagram of ZnSe synthesis. (a) Schematic of the experimental apparatus for the cation exchange method. (b) and (c) Schematic illustration of anion exchange reaction for the synthesis of T-ZnSe nanowires.

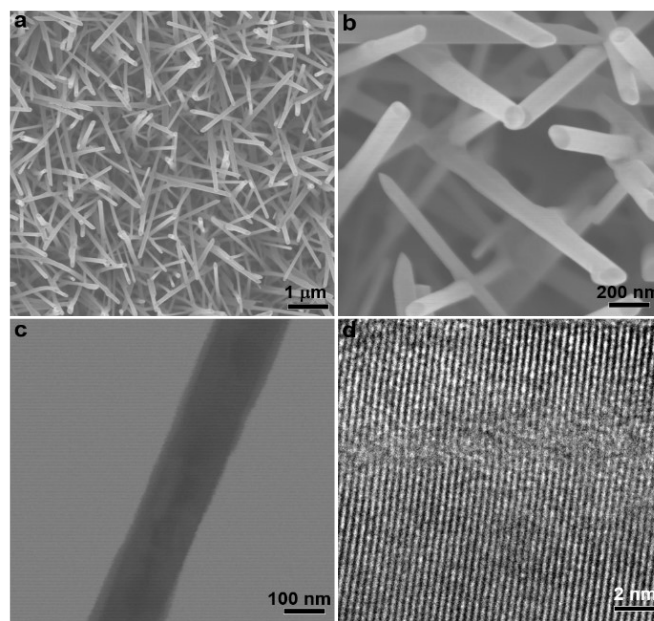

**Fig. S2** Synthesis of ZnO nanowires template. (a) Low and (b) high-magnification SEM images of ZnO nanowires (c) Low and (d) high-magnification TEM images of ZnO nanowires.

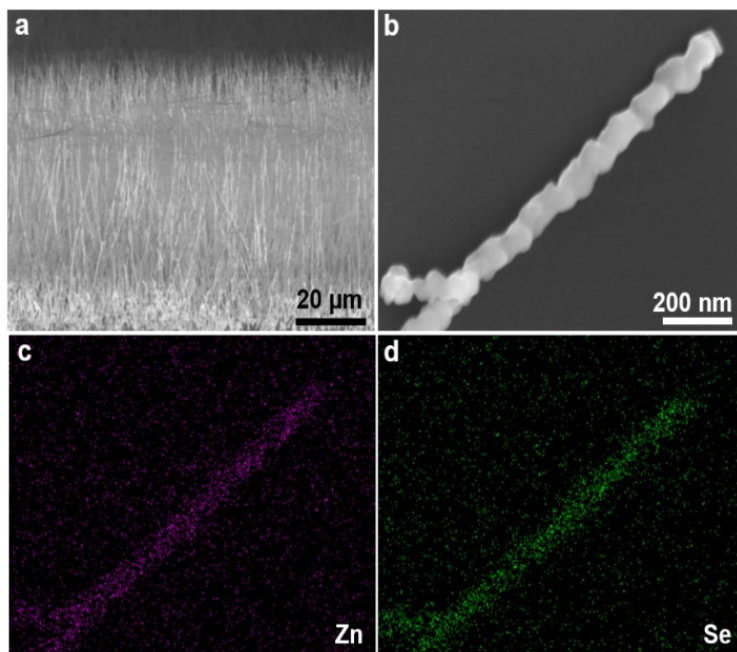

**Fig. S3** Synthesis of T-ZnSe nanowires. (a) Cross SEM of T-ZnSe nanowires. (b) SEM images of T-ZnSe nanowires. (c) and (d) the corresponding elemental mappings of Zn and Se, respectively.

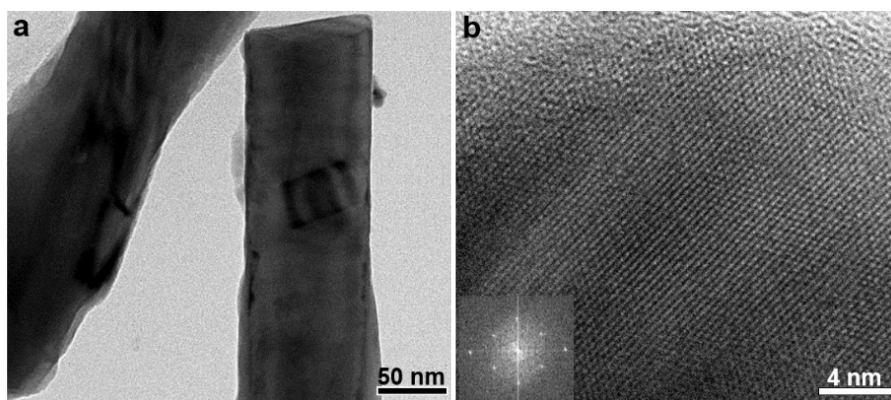

**Fig. S4** Synthesis of S-ZnSe photocatalyst. (a) Low and (b) high-magnification TEM images of S-ZnSe nanowires.

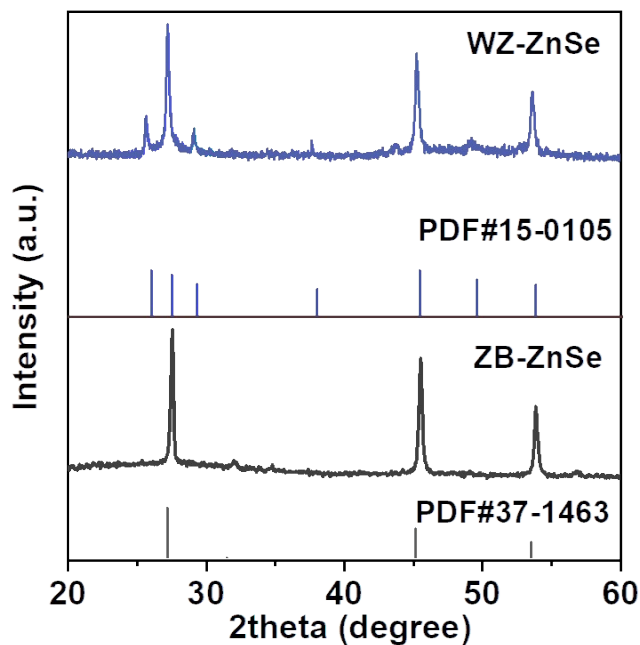

Fig. S5 XRD pattern of ZB-ZnSe and WZ-ZnSe nanowires.

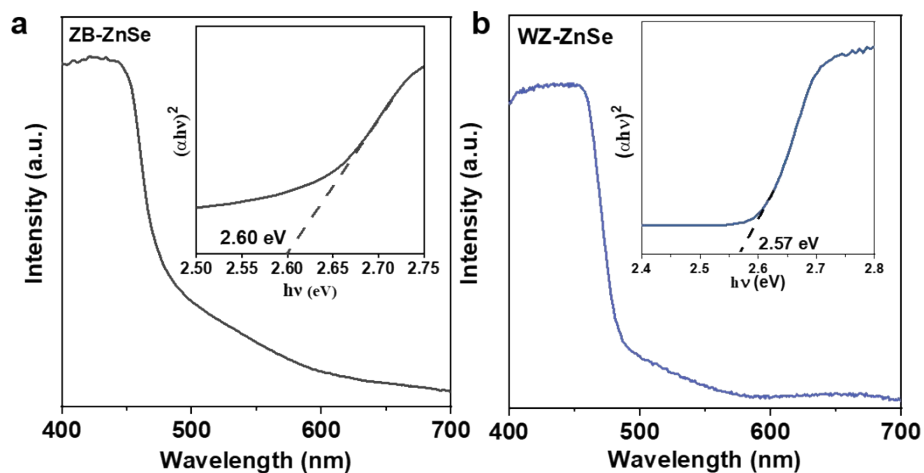

Fig. S6 UV-vis spectra of (a) ZB-ZnSe and (b) WZ-ZnSe nanowires and the insets are Tuac plots.

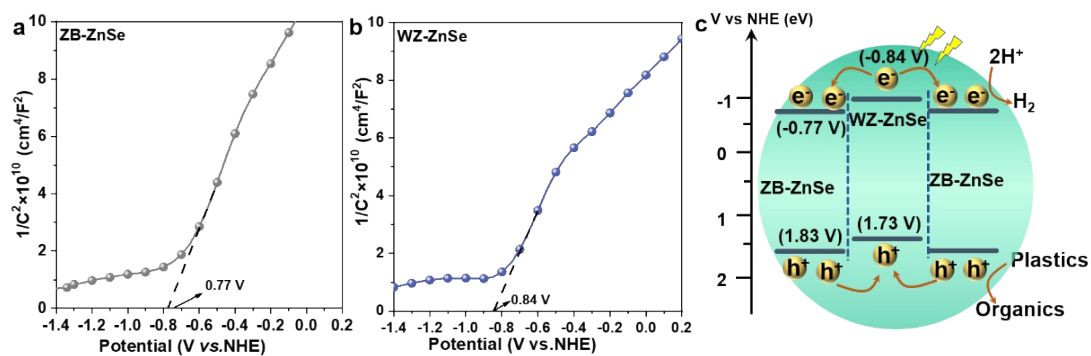

Fig. S7 Mott-Schottky plots of (a) ZB-ZnSe and (b) WZ-ZnSe nanowires. (c) Schematic diagram of the band structure of T-ZnSe.

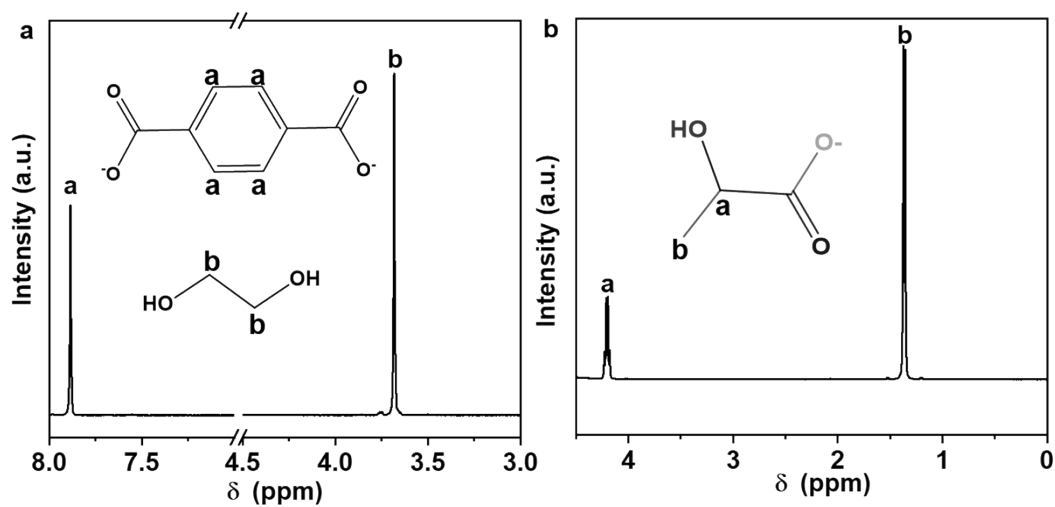

Fig. S8  $^1\text{H}$  NMR spectra for substrates. (a) PET (b) PLA.

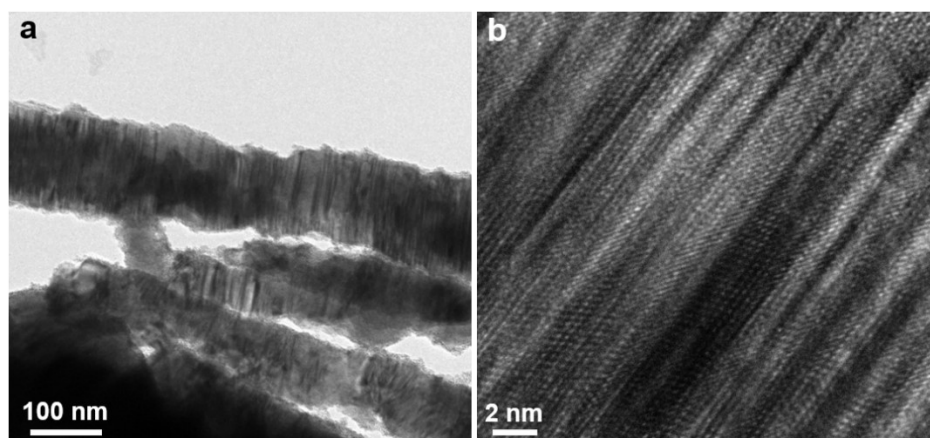

Fig. S9 Low magnification and High magnification TEM images of T-ZnSe after 12 hours of photocatalytic reaction.

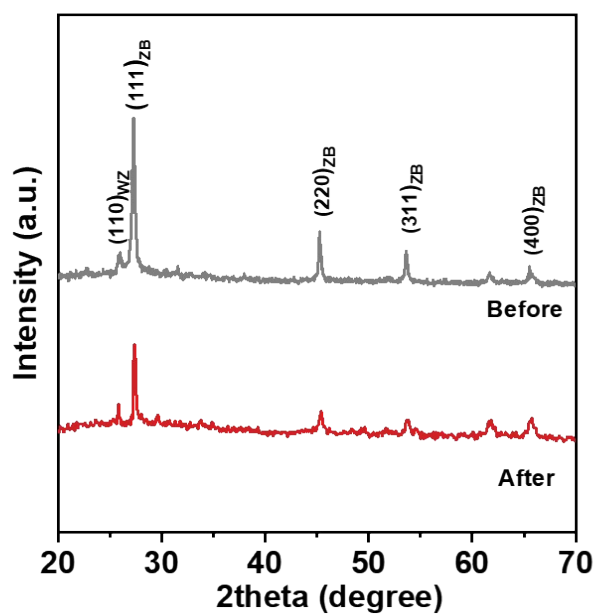

**Fig. S10** XRD pattern of T-ZnSe nanowires before and after 12 hours of photocatalytic reaction.

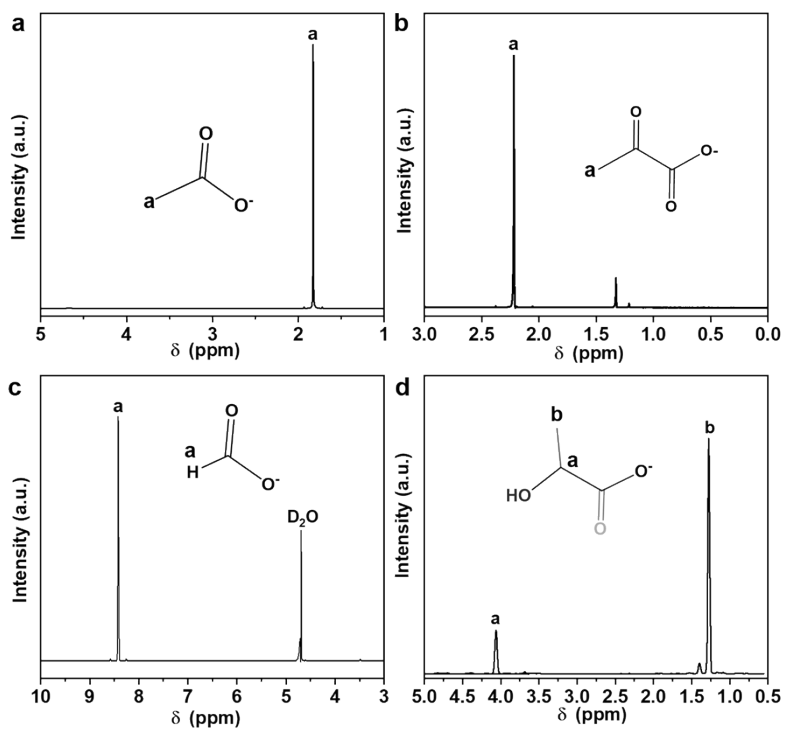

**Fig. S11**  $^1\text{H}$  NMR spectra for standard samples. (a) acetate (b) pyruvate (c) formate (d) lactate.

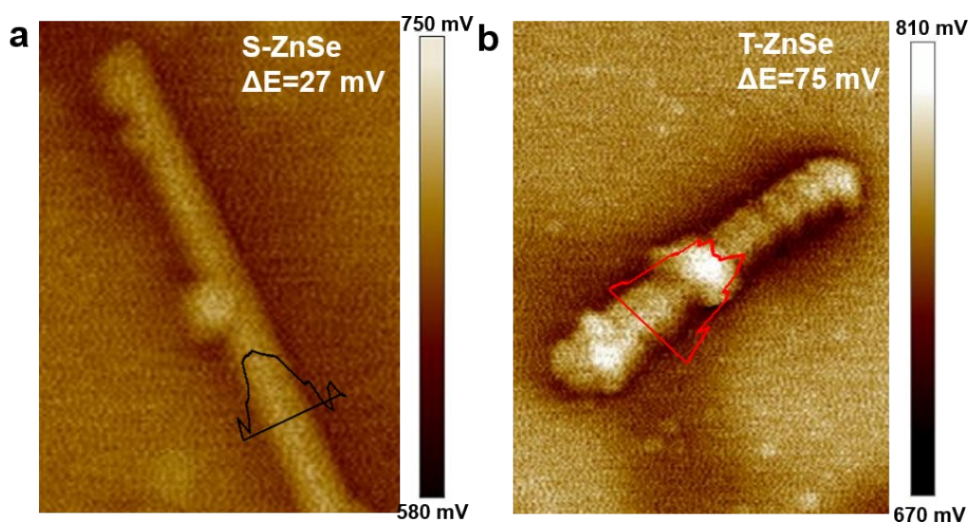

**Fig. S12** AFM images at the surface potential mode for (a) S-ZnSe and (b) T-ZnSe.

**Table S1** Plastic photoreforming performance for S-ZnSe and T-ZnSe photocatalysts.

| Catalyst | substrate | H <sub>2</sub><br>( $\mu\text{mol h}^{-1}$ ) | formate<br>( $\mu\text{mol}\cdot 12\text{h}$ ) | acetate<br>( $\mu\text{mol}\cdot 12\text{h}$ ) | lactate<br>( $\mu\text{mol}\cdot 12\text{h}$ ) | ethanol<br>( $\mu\text{mol}\cdot 12\text{h}$ ) | pyruvate<br>( $\mu\text{mol}\cdot 12\text{h}$ ) |
|----------|-----------|----------------------------------------------|------------------------------------------------|------------------------------------------------|------------------------------------------------|------------------------------------------------|-------------------------------------------------|
| T-ZnSe   | PET       | 42                                           | 41.9                                           | 25.8                                           | 10.7                                           | 7.9                                            | /                                               |
|          | PLA       | 54                                           | /                                              | 37.1                                           | /                                              | /                                              | 91.3                                            |
| S-ZnSe   | PET       | 8                                            | 9.6                                            | 4.6                                            | 2.0                                            | 1.8                                            | /                                               |
|          | PLA       | 13                                           | /                                              | 9.9                                            | /                                              | /                                              | 20.4                                            |
